# Supplementary material
Source: publisher figshare collection journal article supplement (https://gsajournals.figshare.com/ndownloader/files/14345807)
Supplement: Supplementary file 1 [file 14345807]

Supplemental Table 2: Primers used for spanning gaps in gene bodies of *Ccr3* and *Ccr2*

|  | Chromosome 9 position | Primers (5’-3’) | Product length (bp) |
| --- | --- | --- | --- |
| *Ccr3*-01 | 124023996-124024972 | S: ACGTGCATGAAGCCAAGTCT  AS: ATGCAATGGTGAGCTTCCTC | 977 |
| *Ccr3*-02 | 124024606-124025480 | S: CTCCTCACCCCCATTTAGGT  AS: GCCTTCTAGAGAACTGGCAAT | 875 |
| *Ccr3*-03 | 124025282-124026232 | S: AGGCCATGCCTGGTATATTG  AS: CTGCTGTCATGGAAACAACA | 951 |
| *Ccr3*-04 | 124025873-124026861 | S: AAACCTTTAAAATCTTTGAGCTTCC  AS: TTTTAAATTGTGTGCCATAAAGC | 989 |
| *Ccr2*-01 | 124108863-124109754 | S: CCCTGTCCACTAATGCGTTT  AS: CCAACCTCTGGGTTCTCAAA | 892 |
| *Ccr2*-02 | 124108945-124109919 | S: CTGGCTTTGCTACCACATGA  AS: CCACTTTCTTCCAGCTGTCC | 975 |
| *Ccr2*-03 | 124109539-124110497 | S: TTTCCTACTGTGGCATGCAG  AS: TGAGGTTTCAAGGACCCAAG | 959 |
| *Ccr2*-04 | 124110376-124111313 | S: GTCATAGTGGCAGGGAGCAT  AS: AGAGGGGGTATGGTTTCCAG | 938 |
| *Ccr2*-05 | 124111052-124111940 | S: CAGCTCTCCTTGGCAGAAAT  AS: TGCTAATCCACATTGGCAGA | 889 |
| *Ccr2*-06 | 124111898-124112749 | S: TCCCAAAGTCCCTAAATCCA  AS: GGCAGACCACAAACCAAGAC | 852 |
| *Ccr2*-07 | 124112689-124113665 | S: TGGGTTCTGCCTTTTCTGTC  AS: GGGGAATGTCAAGGTCAAGA | 977 |
| *Ccr2*-08 | 124113273-124114260 | S: CTGAAGGGAGGGAATGACAG  AS: ACATGGTTTTCCCAAGCATC | 988 |
| *Ccr2*-09 | 124114237-124115100 | S: AAAGGATGCTTGGGAAAACC  AS: GGCTTTTAGCATGCCACTGT | 864 |
| *Ccr2*-10 | 124114754-124115743 | S: CCCCACAGCTACCTTCAAGA  AS: TGCTTCCTTCTTCCTGCCTA | 990 |
